## Differential Representation of Articulatory Gestures and Phonemes in Motor, Premotor, and Inferior Frontal Cortices

Emily M. Mugler<sup>1</sup>, Matthew C. Tate<sup>2</sup>, Karen Livescu<sup>3</sup>, Jessica W. Templer<sup>1</sup>,  
Matthew A. Goldrick<sup>4</sup>, and Marc W. Slutzky<sup>1,5,6</sup>

Departments of Neurology<sup>1</sup>, Neurosurgery<sup>2</sup>, Linguistics<sup>4</sup>, Physiology<sup>5</sup>, and Physical Medicine & Rehabilitation<sup>6</sup>, Northwestern University, Chicago, IL 60611  
Toyota Technological Institute at Chicago, Chicago, IL 60637

Correspondence: Marc W. Slutzky  
Northwestern University, Dept. of Neurology  
303 E. Superior Ave.  
Lurie 8-121  
Chicago, IL 60611  
mslutzky@northwestern.edu  
312-503-4653 (ph)

**Author Contributions:** EM, MT, MG and MS designed the experiments. EM, MT, and MS acquired the data. EM, MG and MS analyzed the data. EM, KL, and MS designed the algorithms. EM, MT, and JT co-registered electrodes on the brain. EM, MS, and MG wrote the manuscript.

**Keywords:** phonology; articulatory gestures; phonemes; electrocorticography (ECoG); speech production; brain mapping; brain-machine interface

### 1 **ABSTRACT**

2 Speech is a critical form of human communication and is central to our daily lives. Yet, despite decades  
3 of study, an understanding of the fundamental neural control of speech production remains incomplete.  
4 Current theories model speech production as a hierarchy from sentences and phrases down to words,  
5 syllables, speech sounds (phonemes) and the movements of speech articulator muscles used to produce  
6 these sounds (articulatory gestures). Here, we investigate the cortical representation of articulatory  
7 gestures and phonemes in speech motor, premotor, and inferior frontal cortices. Our results indicate  
8 that primary motor and premotor areas represent gestures to a greater extent than phonemes, while  
9 inferior frontal cortex represents both gestures and phonemes. These findings suggest that the cortical  
10 control of speech production shares a common representation with that of other types of movement,  
11 such as arm and hand movements.

12

### 13 **INTRODUCTION**

14 While the cortical control of limb and hand movements is well understood, the cortical control of  
15 speech movements is far less clear. At its most basic level, speech is produced by coordinated  
16 movements of the vocal tract (e.g., lips, tongue, velum, and larynx), but it is not certain exactly how  
17 these movements are planned. For example, during speech planning, *phonemes* are coarticulated—the  
18 *articulatory gestures* that comprise a given phoneme are modified based on neighboring phonemes in  
19 the uttered word or phrase (Whalen, 1990). While the dynamic properties of these gestures, similar to  
20 kinematics, have been extensively studied (Bocquelet et al., 2016; Bouchard et al., 2016; Carey and  
21 McGettigan, 2016; Fabre et al., 2015; Nam et al., 2010; Proctor et al., 2013; Westbury, 1990), there is  
22 no direct evidence of gestural representations in the brain.

23 Classically, based on lesion studies and electrical stimulation, the neural control of speech  
24 production was described as starting in the inferior frontal gyrus, with low-level, non-speech  
25 movements elicited in primary motor cortex (M1v; Broca, 1861; Penfield and Rasmussen, 1949). A  
26 more recent study of electrical stimulation sites causing speech arrest confirmed that these sites were  
27 located almost exclusively in the inferior precentral gyrus (PMv and M1v), confirming that these areas  
28 are critical for speech production (Tate et al., 2014). Recent models of speech production propose that  
29 articulatory gestures are combined to create higher-level, acoustic outputs (phonemes) (Browman and  
30 Goldstein, 1992; Guenther et al., 2006). One model (Guenther et al., 2006) hypothesized that ventral  
31 premotor cortex (PMv) and inferior frontal gyrus (IFG, part of Broca's area) preferentially represent  
32 phonemes and that M1v preferentially represents gestures. This hypothesis is analogous to our  
33 understanding of limb motor control. Premotor and posterior parietal cortices preferentially encode  
34 for the targets of reaching movements (Hatsopoulos et al., 2004; Hocherman and Wise, 1991; Pesaran  
35 et al., 2006; Pesaran et al., 2002; Shen and Alexander, 1997), while M1 preferentially encodes reach  
36 trajectories (Georgopoulos et al., 1986; Moran and Schwartz, 1999), force (Evarts, 1968; Flint et al.,  
37 2014; Scott and Kalaska, 1997), or muscle activity (Cherian et al., 2013; Kakei et al., 1999; Morrow  
38 and Miller, 2003; Oby et al., 2013). However, the model's hypothesized localizations of speech motor  
39 control were based on indirect evidence. The location of phonemes in PMv (Levelt, 1999) was  
40 postulated based on circumstantial evidence from behavioral studies (Ballard et al., 2000) and fMRI  
41 studies which primarily examined the syllabic — rather than phonemic — level of speech (Ghosh et  
42 al., 2008; Guenther et al., 2006; Tourville et al., 2008). This model also hypothesized that gestures are  
43 encoded in M1v based on indirect evidence of non-speech articulator movements (Fesl et al., 2003;  
44 Penfield and Roberts, 1959) and fMRI studies of syllable sequencing (Riecker et al., 2000). However,  
45 none of the modalities used in these studies had sufficient combination of temporal and spatial  
46 resolution to provide definitive information about where, and more importantly how, gestures and  
47 phonemes are encoded.

48 Over the last decade, electrocorticography (ECoG) has enabled identification of neural activity  
49 with high spatial and temporal resolution during speech production (Blakely et al., 2008; Bouchard et  
50 al., 2013; Cogan et al., 2014; Edwards et al., 2010; Kellis et al., 2010; Leuthardt et al., 2011; Mugler  
51 et al., 2014b; Pei et al., 2011; Roland et al., 2010). High gamma activity in ECoG in M1v concurred  
52 with Penfield's original somatotopic mappings of the articulators (Penfield and Boldrey, 1937).  
53 Several ECoG studies have found evidence that M1v activity roughly correlates with phoneme  
54 production (Bouchard et al., 2013; Leuthardt et al., 2011; Lotte et al., 2015; Ramsey et al., 2017).  
55 Mugler et al. demonstrated that single instances of phonemes can be identified during word production  
56 using ECoG from M1v and PMv (Mugler et al., 2014b). However, the ability to decode phonemes  
57 from these areas was rather limited, which suggests that phonemes may not completely characterize  
58 the representation of these cortical areas. Some ECoG evidence exists that cortical activation differs  
59 for phonemes depending on the context of neighboring phonemes (Bouchard and Chang, 2014; Mugler  
60 et al., 2014a). Moreover, incorporating probabilistic information of neighboring phonemes improves  
61 the ability to decode phonemes from M1v (Herff et al., 2015). Therefore, these areas might demonstrate  
62 predominant representation for gestures, not phonemes. However, no direct evidence of gestural  
63 representation in the brain has yet been demonstrated.

64 Here, we used ECoG from M1v, PMv, and IFG to classify phonemes and gestures during spoken  
65 word production. We hypothesized that ventral motor cortex represents the movements of speech, and  
66 M1v activity accordingly predominantly represents articulatory gestures. We first examined how  
67 classification accuracy of phoneme and gestures varied with the context or position within a word. We  
68 next compared the relative performance of gesture and phoneme classification in each cortical area.

69 Finally, we used a special case of contextual variance — *allophones*, in which the same phoneme is  
70 produced with different combinations of gestures — to highlight more distinctly the gestural vs.  
71 phonemic predominance in each area. The results indicate that gestures are the predominant  
72 fundamental unit of speech production represented in the primary motor and premotor cortical areas,  
73 while both phonemes and gestures appear to be more weakly represented in IFG, with gestures still  
74 slightly more predominant.

75

## 76 **RESULTS**

77 We simultaneously recorded ECoG from M1v, PMv, and IFG (pars opercularis) and speech audio  
78 during single word, monosyllabic utterances by 9 human participants (8 with left hemispheric  
79 recordings) undergoing functional mapping during awake craniotomies for resection of brain tumors  
80 (Figure 1 and Figure S1). Lesions were remote from speech production areas and no subjects had any  
81 language or speech deficits in neuropsychological testing. We manually labeled the onset of the  
82 acoustic release of each phoneme (Mugler et al., 2014b) and we employed acoustic-articulatory  
83 inversion (AAI; Wang et al., 2014; Wang et al., 2015; see Methods) in combination with the Task  
84 Dynamic Model (Nam et al., 2012) to precisely label articulatory gesture onset. We examined z-scored  
85 activity in the high gamma (70-300 Hz) band, since this band is highly informative about limb motor  
86 (Chao et al., 2010; Crone et al., 2001; Flint et al., 2012a; Flint et al., 2012b; Mehring et al., 2004),  
87 speech (Bouchard et al., 2013; Crone et al., 2001; Pei et al., 2011; Ramsey et al., 2017), and  
88 somatosensory activity (Ray et al., 2008), and correlates with ensemble spiking activity (Ray and  
89 Maunsell, 2011) and blood oxygenation level dependent (BOLD) activity (Hermes et al., 2012;  
90 Logothetis et al., 2001).

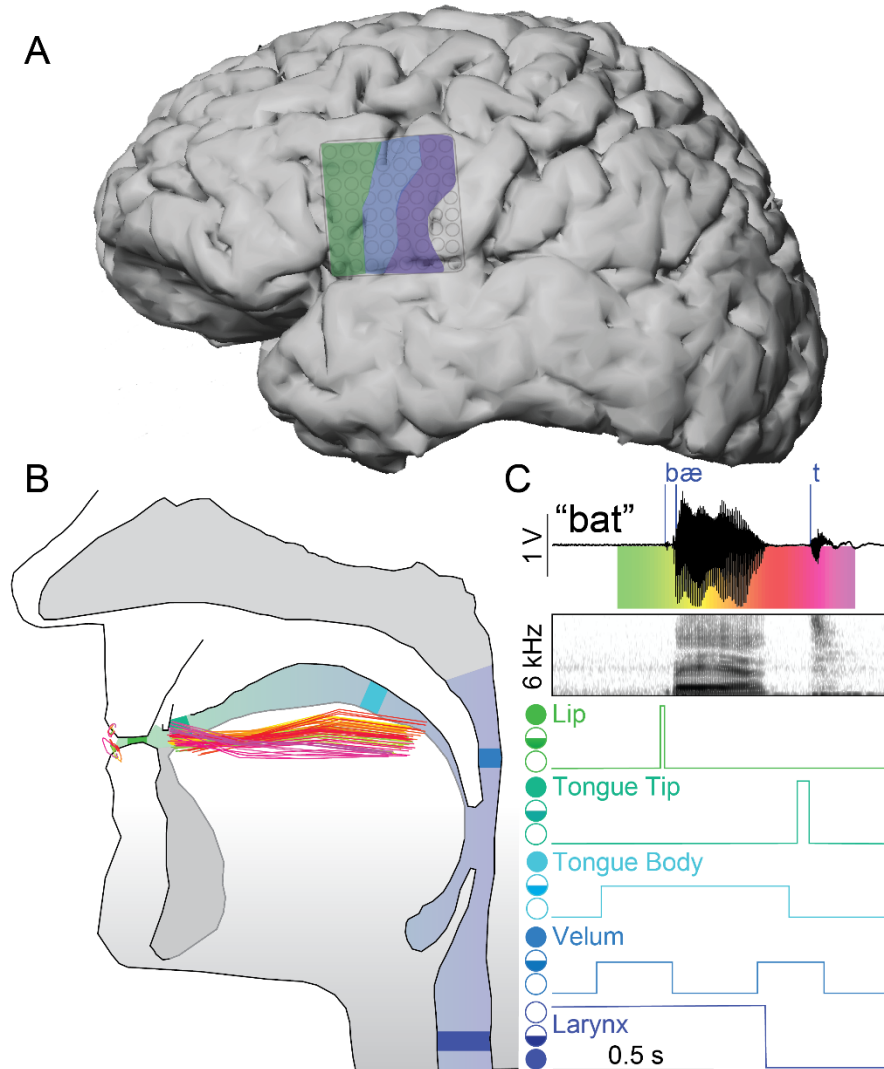

91  
92 **Figure 1.** Defining phoneme and articulatory gesture onsets. (A) Cerebral cortex of participant S5 with  
93 recorded regions of speech motor cortex highlighted – IFG (green), PMv (blue), and M1v (purple). (B)  
94 Vocal tract with positions of the lips, tongue body, and tongue tip during production of a single word.  
95 Each trace represents the position, at 10-ms intervals, generated by the acoustic-articulatory inversion  
96 model, from word onset (green) to word offset (magenta; see corresponding colors in (C)). (C)  
97 Example audio signal, and corresponding audio spectrogram, from S5 with labeled phonemic event  
98 onsets (blue vertical lines) mapped to apertures along the vocal tract. Apertures for each articulator are  
99 marked from open (open circle), to critical (half-filled circle), to closed (filled circle); note that larynx  
100 has opposite open/close orientation as its default configuration is assumed to be near closure (vibrating;  
101 Browman and Goldstein, 1992).

102  
103 **Phoneme-related, but not gesture-related, cortical activity varies with intra-word position**  
104 We analyzed how cortical high gamma activity varies with the context of phonemic and gestural events  
105 (i.e., coarticulation) in two subjects producing consonant-vowel-consonant words. We used the high  
106 gamma activity on each electrode to classify whether each consonant phoneme or gesture was the  
107 initial or final consonant in each word. The coarticulation of speech sounds means that phonemes are  
108 not consistently associated with one set of gestures across intra-word positions. Therefore, if gestures

109 characterize the representational structure of a cortical area, we predicted that the cortical activity  
110 associated with a phoneme should vary across word positions. In contrast, because gestures  
111 characterize speech movements that do not vary with context, the cortical activity associated with a  
112 gesture should also be context-invariant. Therefore, we did not expect to be able to classify a gesture's  
113 position with better than chance accuracy. We found that the high gamma activity patterns across M1v  
114 and PMv did not change with position of the gesture within a word (Figure 2A, right). In contrast,  
115 when aligned to phoneme onset, high gamma activity in M1v and PMv did vary with position within  
116 the word (Figure 2A, left). To reduce the likelihood of including cortical activity related to production  
117 of neighboring events (phonemes or gestures of lips and tongue) in our classification, we only used the  
118 high gamma activity immediately surrounding event onset (from 100 ms before to 50 ms after) to  
119 classify intraword position. Figure 2B shows an example of classification of tongue body and tongue  
120 tip closure position from all electrodes which predominantly encoded those gestures (based on single-  
121 electrode decoding of all gesture types – see Methods). Gesture classification accuracies were not  
122 larger than chance, while corresponding phonemes /k/ and /t/ were indeed larger than chance. To  
123 quantify the accuracy of classification compared to chance over electrodes, we computed the  
124 discriminability index  $d'$  on each electrode (Figure 2C).  $d'$  is the difference of means (in this case,  
125 between phoneme or gesture position and chance accuracy) divided by the pooled SD (see Methods).  
126 We computed the mean  $d'$  over all electrodes in M1v and PMv that were modulated with either lip or  
127 tongue movements. We found that  $d'$  was large for phonemes ( $2.3 \pm 0.6$ ) and no different from zero for  
128 gestures ( $-0.06 \pm 0.6$ ). Thus, cortical activity for gestures did not vary with context, while cortical  
129 activity for phonemes varied substantially across contexts.  
130

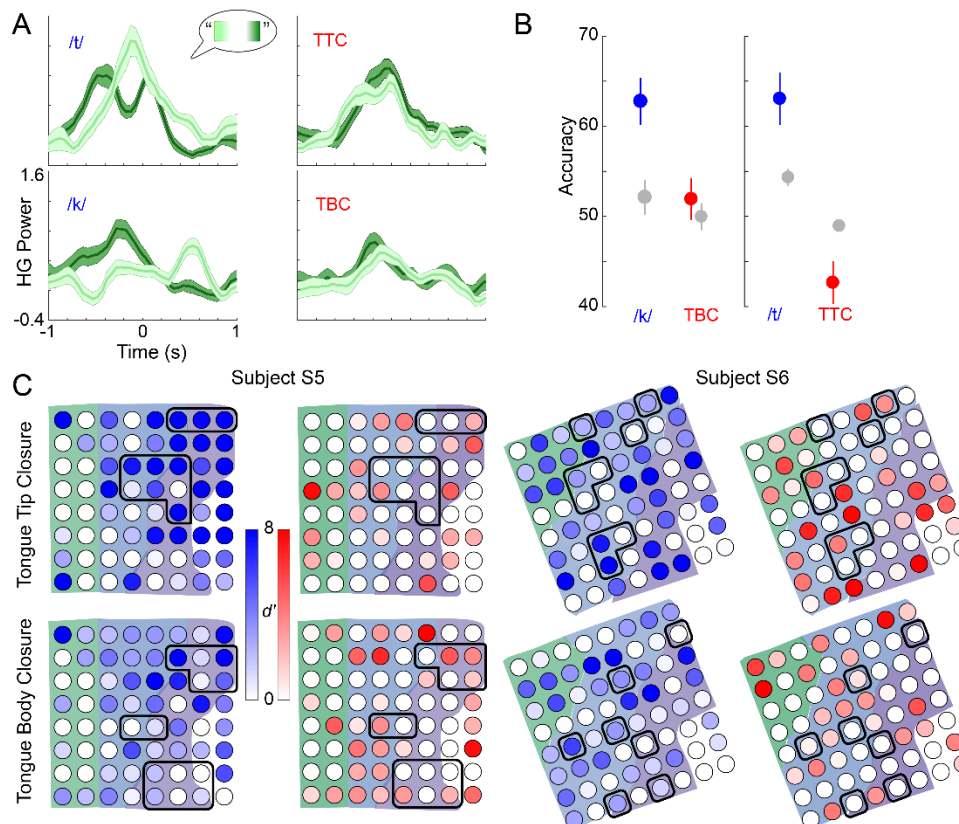

131

132 **Figure 2.** Variation of cortical activity with intraword position of phonemes and gestures. (A) Mean  
 133 ( $\pm$ SD, shaded areas) high gamma activity on two electrodes in subject S5 aligned to onset of the  
 134 phoneme (left) or gesture (right) event. Activity is separated into instances of all events (/t/ or /k/ for  
 135 phonemes, tongue tip closure (TTC) or tongue body closure (TBC) for gestures) occurring either at the  
 136 beginning of a word (light green) or at the end of a word (dark green). Phoneme-related activity  
 137 changes with context, while gesture-related activity does not. (B) Classification accuracy (mean  $\pm$   
 138 SEM) of intraword position on tongue body and tongue tip related electrodes in subject S5 for  
 139 phonemes (blue), gestures (red). Gestural position classification does not outperform chance (gray),  
 140 while phonemic position classification performs significantly higher than chance. (C) Cortical  
 141 distribution of  $d'$  for differences between phonemic and gestural position accuracy and chance.  
 142 Phonemic position accuracy is much higher than chance while gestural position accuracy is not on  
 143 tongue tip and tongue Body related electrodes (outlined electrodes). Shaded areas correspond to  
 144 cortical areas.

145

### 146 **M1v, PMv, and IFG more accurately represent gestures than phonemes**

147 To further investigate sublexical representation in the cortex, we used high gamma activity from 8  
 148 participants to classify which phoneme or gesture was being uttered at each event onset. We classified  
 149 consonant phonemes and gestures separately using recordings combined from motor and premotor  
 150 areas (see Methods). Combined M1v/PMv activity classified gestures with significantly higher  
 151 accuracy than phonemes:  $63.7 \pm 3.4\%$  vs.  $41.6 \pm 2.2\%$  (mean  $\pm$  SEM across subjects,  $p=0.01$ , Wilcoxon  
 152 signed-rank test used for all p-values reported) as seen in Figure 3A. Gestural representation remained  
 153 significantly dominant over phonemes after subtracting the chance decoding accuracy for each type

154 (mean  $34.3 \pm 3.4\%$  vs.  $17.5 \pm 2.2\%$ ,  $p=0.008$ ; Figure 3B; see Methods for chance accuracy  
 155 computations).  
 156

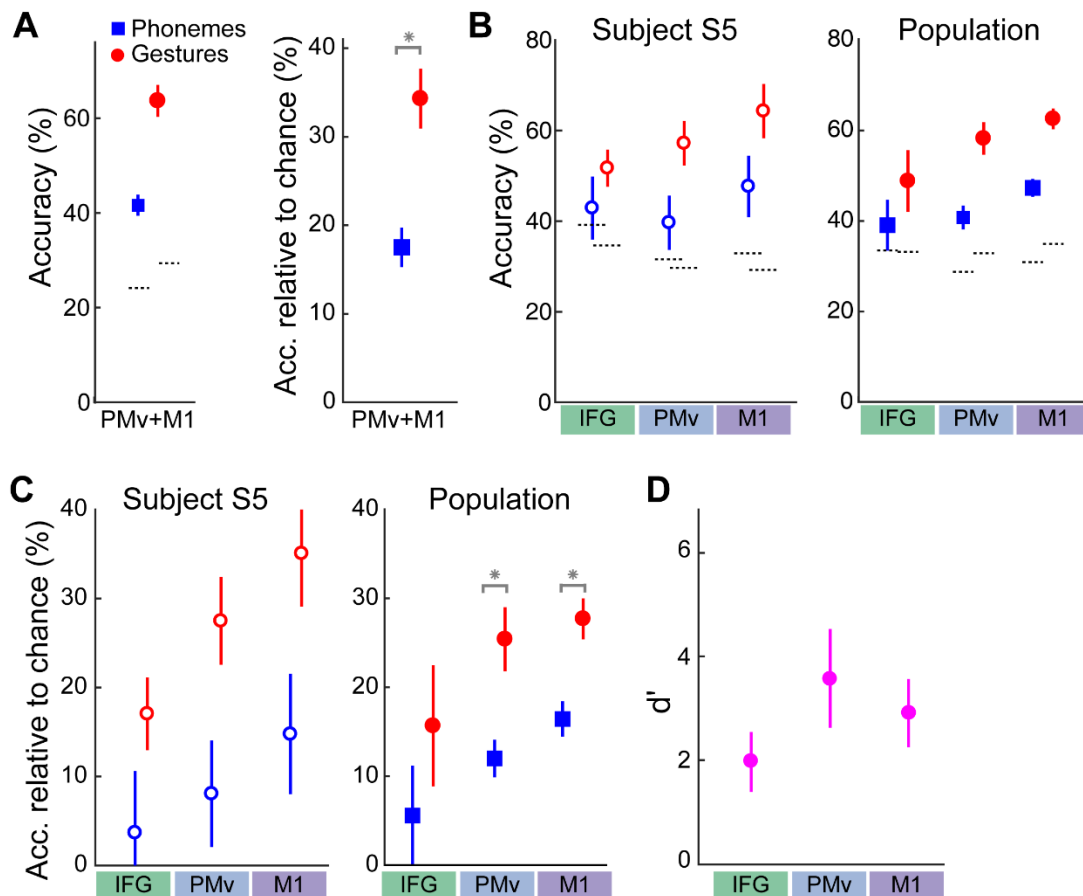

157  
 158 **Figure 3.** Classification of phonemes and gestures. (A) Mean ( $\pm$ SEM over subjects) classification  
 159 accuracy using combined PMv and M1v activity of phonemes (blue squares) and gestures (red circles).  
 160 Shown are both raw accuracy (left, dotted lines showing chance accuracy) and accuracy relative to  
 161 chance (right). Gestures were classified significantly (\*) more accurately than phonemes. (B)  
 162 Classification accuracy for phonemes and gestures using activity from IFG, PMv, and M1v separately,  
 163 for subject S5 (left ( $\pm$ SD) and population mean ( $\pm$ SEM, right). (C) Accuracy relative to chance in each  
 164 area for subject S5 (left) and population mean (right). Gesture classification was significantly higher  
 165 than phoneme classification in M1v and PMv (\*). (D)  $d'$  values (mean $\pm$ SEM over subjects) between  
 166 gesture and phoneme accuracies in each area. Source data are included for A and B-D.

167  
 168 M1v, PMv, and IFG have been theorized to contribute differently to speech production, movements,  
 169 and preparation for speech. We therefore investigated the representation of each individual area by  
 170 performing gesture and phoneme classification using electrodes from each cortical area separately.  
 171 Classification performance of both types increased moving from anterior to posterior areas. In each  
 172 area, gestures were classified with greater accuracy than phonemes (IFG:  $48.8 \pm 6.8\%$  vs.  $39.1 \pm 5.6\%$ ,  $p$   
 173  $= 0.03$ ; PMv:  $58.3 \pm 3.6\%$  vs.  $40.7 \pm 2.1\%$ ,  $p = 0.016$ ; M1v:  $62.6 \pm 2.2\%$  vs.  $47.3 \pm 2.0\%$ ,  $p = 0.008$ ; Figure  
 174 3C). This predominance remained after subtracting chance accuracy across subjects (IFG:  $17.9 \pm 6.4\%$ ,  
 175  $p = 0.016$ , PMv:  $25.3 \pm 12.0\%$ ,  $p = 0.08$ , M1v:  $27.7 \pm 16.4\%$ ,  $p = 0.016$ ; Figure 3D). The difference was  
 176 significant in M1v and PMv, but not in IFG, when using Bonferroni correction for multiple

177 comparisons. The difference in accuracy was not due to gestures having a slightly greater incidence  
178 than phonemes, as significant differences remained when we performed decoding on a dataset with  
179 maximum numbers of gesture and phoneme instances matched (data not shown). To quantify the  
180 difference further, we computed  $d'$  between accuracies of gestures and phonemes in each area. The  $d'$   
181 values in M1v and PMv were both very high (3.6 and 2.9), while that in IFG was slightly less (2.0),  
182 suggesting decreased gestural predominance in IFG than in M1v or PMv.

183

#### 184 **Allophone classification supports predominance of gestural representations**

185 In four subjects, we used a specific set of spoken words from speech control literature that included  
186 allophones to amplify the distinction between phonemic and gestural representation in specific cortical  
187 areas (Buchwald and Miozzo, 2011). Allophones are different pronunciations of the same phoneme in  
188 different contexts within words, which reflect the different gestures being used to produce that  
189 phoneme (Browman and Goldstein, 1992). For example, consonant phonemes are produced differently  
190 when isolated at the beginning of a word (e.g., the /t/ in “tab”, which is aspirated, or voiceless)  
191 compared to when they are part of a cluster at the beginning of a word (e.g., the /t/ in “stab”, which is  
192 not aspirated and is acoustically more similar to a voiced /d/, Figure 4A). Using word sets with  
193 differing initial consonant allophones enabled us to dissociate more directly the production of  
194 phonemes from the production of gestures. This can be thought of as changing the mapping between  
195 groups of gestures and an allophone, analogous to limb motor control studies that used visual rotations  
196 to change the mapping between reach target and kinematics to assess cortical representation (Paz et  
197 al., 2003; Wise et al., 1998). The /t/ in “st” words was produced with high gamma activity more like  
198 a /d/ in M1 electrodes, and more like a solitary initial /t/ in PMv and IFG (Figure 4B). We trained  
199 separate classifiers for voiceless and voiced consonants (VLC and VC, respectively), and tested their  
200 performance in decoding both the corresponding isolated allophone (VLC or VC) and the  
201 corresponding consonant cluster allophone (CCIA). For example, we built classifiers of /t/ (vs. all other  
202 consonants) and /d/ (vs. all other consonants) and tested them in classifying the /t/ in words starting  
203 with “st” (see Methods for details). We investigated the extent to which cluster allophones behaved  
204 more similarly to voiceless consonants or to voiced consonants. If CCIA were classified with high  
205 performance using the voiceless classifier, we would infer that phonemes were the dominant  
206 representation. If CCIA were classified with high performance using the voiced classifier, we would  
207 infer that gestures were the dominant representation (Figure 4C). If CCIA were classified with low  
208 performance by both classifiers, it would suggest that the CCIA were a distinct category, produced  
209 differently from the voiced and from the voiceless allophone.

210 Cluster consonants behaved less like the phoneme and more like the corresponding gesture when  
211 moving from anterior to posterior in the cortex (Figure 4D and 4E). For example, in IFG and PMv,  
212 the CCIA behaved much more like the VLC phonemes than they did in M1v ( $p=0.6, 0.5,$  and  $0.008$   
213 and  $d'=0.1, 0.2,$  and  $0.4$  in IFG, PMV, and M1v, respectively for performance of the VLC classifier  
214 on VLCs vs. CCIA). The CCIA behaved more like the VC phonemes in M1v than in PMv and IFG  
215 ( $d'=0.4, 0.7,$  and  $0.3$  in IFG, PMv, and M1v, respectively), although there was still some difference in  
216 M1v between CCIA performance and VC performance. The CCIA were produced substantially more  
217 like VC phonemes than like VLC phonemes in M1v, which implies that M1v predominantly represents  
218 gestures. The difference between CCIA and VC phonemes suggests that the cluster allophones may  
219 represent another distinct speech sound category.



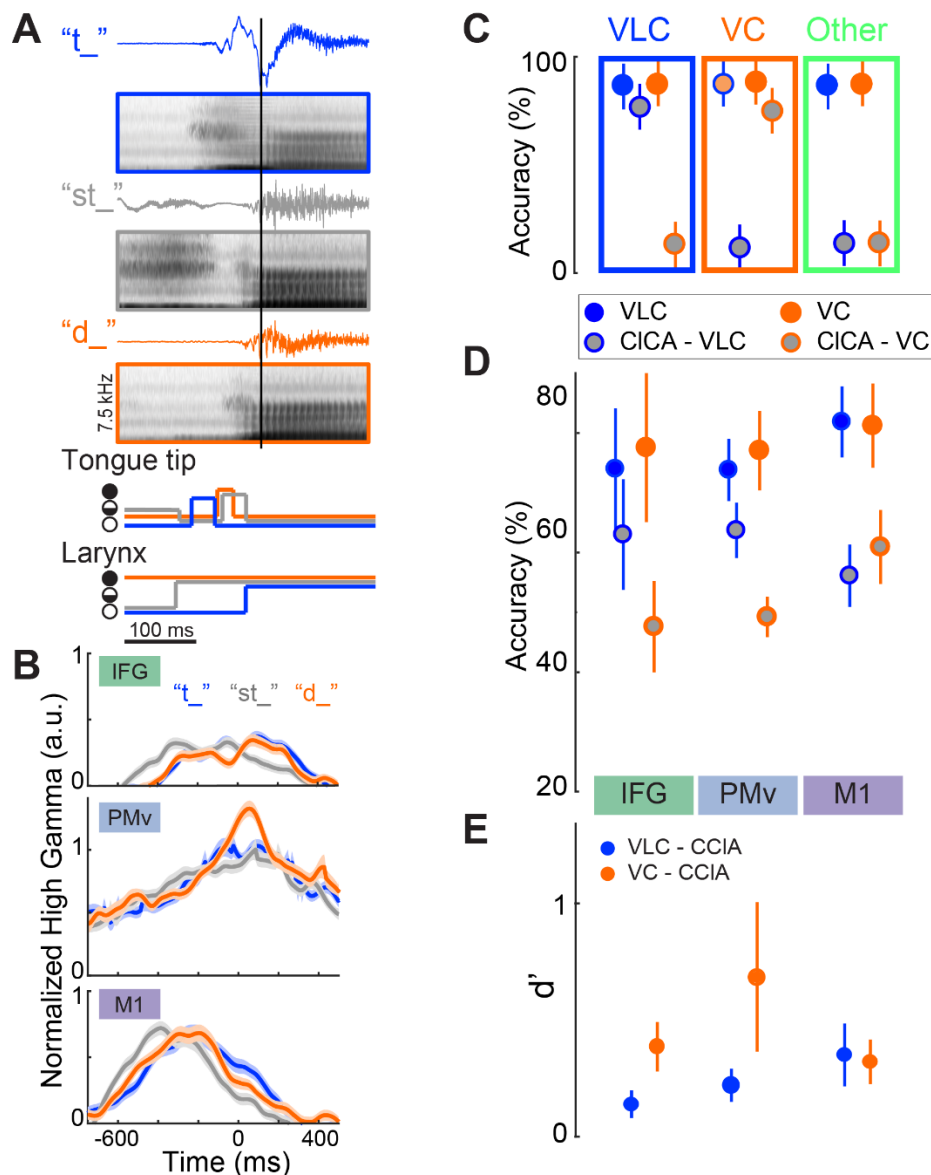

220  
 221 **Figure 4.** Classification of consonant allophones using ECoG from each cortical area. (A) Examples  
 222 of audio waveforms, averaged spectrograms, and simplified gestural articulator trajectories for an  
 223 allophone set ( $\{/t/, /st/, /d/\}$ ) aligned to vowel onset (black vertical line). Only the trajectories for  
 224 articulators that show differences for these phonemes are depicted (TT: tongue tip, Lx: larynx; filled  
 225 circle: close, open circle: open, half-filled: partial closure (critical)). Colors throughout the figure  
 226 represent VLC (/t/, blue), VC (/d/, orange), and CCIA (/st/, gray). (B) Examples of normalized high  
 227 gamma activity (mean $\pm$ SE) at 3 electrodes during /t/, /d/, and /st/ production in subject S5. Allophone  
 228 onset is at time 0. One electrode from each cortical area is shown. CCIA activity (gray) in these IFG  
 229 and PMv electrodes is more similar to the VLC (blue) especially around time 0, while in M1v, it is  
 230 more similar to VC (orange). (C) Schematic depicting three different idealized performance patterns  
 231 in a single cortical area. Solid circles denote performance of classification of VLCs (blue) and VCs  
 232 (orange) using their respective classifiers. Gray-filled circles denote CCIA classification performance  
 233 using the VLC (blue outline) and VC (orange outline) classifiers. High CCIA performance (close to  
 234 that of the respective solid color) would indicate that the allophone behaved more like the VLC or VC  
 235 than like other consonants in the data set. If the CCIA performed similarly to the VLC (as in the blue

236 rectangle), it would imply that area preferentially encoded phonemes. If the CCIA performed similarly  
237 to the VC (orange rectangle), the area preferentially encoded gestures. If CCIA performed differently  
238 than both VLCs and VCs (green rectangle), this implied that CCIA were produced differently from  
239 either VCs and VLCs. (D) Classification performance (mean $\pm$ SEM across subjects and allophone sets)  
240 in each cortical area of VLCs and CCIA in voiceless classifiers, and VCs and CCIA in voiced  
241 classifiers. CCIA show much lower performance on VLC classifiers than VLCs perform in M1v,  
242 while the performance is much closer in IFG and PMv. The opposite trend occurs with CCIA  
243 performance on the VC classifiers. (E)  $d'$  values (mean $\pm$ SEM across subjects and sets) between the  
244 singlet consonant performance and allophone consonant performance for each area; larger values are  
245 more discriminable. Blue circles: VLC vs. CCIA performance using VLC classifier;s orange circles:  
246 VC vs. CCIA performance using VC classifiers. In summary, CCIA perform more like VLCs and less  
247 like VCs moving from posterior to anterior. Source data are included for (D).

248

## 249 **DISCUSSION**

250 We investigated the representation of articulatory gestures and phonemes in ventral motor, ventral  
251 premotor, and inferior frontal cortices during speech production. Cortical activity in these areas  
252 enabled discrimination of the intraword position of phonemes but not the position of gestures. This  
253 suggested that gestures provide a more parsimonious, and likely more accurate, description of what is  
254 encoded in these cortices. Gesture classification significantly outperformed phoneme decoding in M1v  
255 and PMv, and trended toward better performance in IFG. Cortical activity in each area, as well as in  
256 M1v and PMv combined, preferentially encoded articulatory gestures more than phonemes.  
257 Consonants in clusters behaved more similarly to the consonant that shared more similar gestures  
258 (voiced), rather than the consonant that shared the same phoneme (voiceless) in more posterior (caudal)  
259 areas, though this relationship tended to reverse in more rostral areas. Together, these results indicate  
260 that cortical activity in M1v, PMv, and possibly IFG, represents gestures to a greater extent than  
261 phonemes during production.

262 This is the first direct evidence of gesture encoding in the speech motor cortices. This evidence  
263 impacts theoretical models of speech production developed over decades of interdisciplinary research.  
264 The results support models incorporating gestures in speech production, such as the Task Dynamic  
265 model of inter-articulator coordination (TADA) and the Directions-Into-Velocities of Articulators  
266 (DIVA) model (Guenther et al., 2006; Hickok et al., 2011; Saltzman and Munhall, 1989). The DIVA  
267 model, in particular, hypothesizes that gestures are encoded in M1v. These results also suggest that  
268 models not incorporating gestures, instead proposing that phonemes are the immediate output from  
269 motor cortex to brainstem motor nuclei, may be incomplete (Hickok, 2012; Levelt, 1999; Levelt et al.,  
270 1999).

271 The phenomenon of coarticulation, i.e., that phoneme production is affected by planning and  
272 production of neighboring phonemes, has long been established using kinematic, physiologic (EMG),  
273 and acoustic methods (Denby et al., 2010; Kent, 1977; Magen, 1997; Öhman, 1966; Schultz and Wand,  
274 2010; Whalen, 1990). Our results showing discrimination of intraword phoneme position and  
275 differences in allophone encoding confirm the existence of phoneme coarticulation in cortical activity  
276 as well. Bouchard and colleagues first demonstrated evidence of M1v representation of coarticulation  
277 during vowel production (Bouchard and Chang, 2014). Our results demonstrate cortical representation  
278 of coarticulation during consonant production. Some have suggested that coarticulation can be  
279 explained by the different gestures that are used when phonemes are in different contexts (Browman  
280 and Goldstein, 1992; Buchwald, 2014). Since gestures can be thought of as a rough estimate of  
281 articulator movements, our results demonstrating gesture encoding suggest that M1v and PMv likely

282 encode the kinematics of articulators to a greater extent than the phonemic (or possibly acoustic)  
283 outputs.

284 The use of allophones enabled us to dissociate the correlation between phonemes and gestures, as  
285 a single consonant phoneme is produced differently in the different allophones. In M1v, the CCIAs  
286 did not behave like either the VLC phonemes or VC phonemes, though they were more similar to VC  
287 phonemes. Overall, this suggests that the CCIAs are produced differently than either VCs or VLCs,  
288 which supports previous findings. Prior to release of the laryngeal constriction, the CCIAs are  
289 hypothesized to be associated with a laryngeal gesture that is absent in VC phonemes (Browman and  
290 Goldstein, 1992). Thus, it is not surprising that we observed this difference in classification between  
291 CCIAs and VCs (Figure 4A). These results, therefore, still support a gestural representation in M1v  
292 as well as in PMv and IFG.

293 This study provides a deeper look into IFG activity during speech production. The role of IFG in  
294 speech production to date has been unclear. The classical view of Broca that IFG was involved in word  
295 generation (Broca, 1861) has been contradicted by more recent studies providing conflicting imaging  
296 evidence of phoneme production (Wise et al., 1999), syllables (Indefrey and Levelt, 2004), and syllable  
297 to phoneme sequencing and timing (Flinker et al., 2015; Gelfand and Bookheimer, 2003; Long et al.,  
298 2016; Papoutsi et al., 2009). Flinker et al. showed that IFG activity was involved in articulatory  
299 sequencing (Flinker et al., 2015). The trend toward greater accuracy in classifying gestures than  
300 phonemes using IFG activity suggests that there is at least some information in IFG related to gesture  
301 production. While our results cannot completely address IFG's function due to somewhat limited  
302 electrode coverage (mainly pars opercularis) and experimental design, they do provide evidence for  
303 gesture representation in IFG.

304 These results imply that speech production cortices share a similar organization to limb-related  
305 motor cortices, despite clear differences between the neuroanatomy of articulator and limb innervation  
306 (e.g., cranial nerve compared to spinal cord innervation). In this analogy, gestures represent articulator  
307 positions at discrete times (Guenther et al., 2006), while phonemes can be considered speech targets.  
308 In arm and hand areas of M1, the reach trajectory (and arm muscle activity) is represented to a greater  
309 extent than the target of a reach (Cherian et al., 2013; Georgopoulos et al., 1986; Oby et al., 2013).  
310 This suggests that M1v predominantly represents articulator kinematics and/or muscle activity, though  
311 more detailed measurements of articulator positions (or EMG) with ECoG could demonstrate this more  
312 definitively (Bouchard et al., 2016). While we found that gesture representations predominated over  
313 phonemic representations in all 3 areas, there was progressively less predominance in PMv and IFG,  
314 which could suggest a rough hierarchy of movement-related information in the cortex (although  
315 phonemic representations can also be distributed throughout the cortex (Cogan et al., 2014)). We also  
316 found evidence for encoding of gestures and phonemes in both dominant and non-dominant  
317 hemispheres, which corroborates prior evidence of bilateral encoding of sublexical speech production  
318 (Bouchard et al., 2013; Cogan et al., 2014). This analogous organization suggests that observations  
319 from studies of limb motor control may be extrapolated to other parts of motor and premotor cortices.

320 Brain machine interfaces (BMIs) could substantially improve the quality of life of individuals who  
321 are completely paralyzed, or "locked-in," from neurological disorders such as amyotrophic lateral  
322 sclerosis, brainstem stroke, or cerebral palsy. Just as the cortical control of limb movements has led to  
323 advances in motor BMIs, a better understanding of the cortical control of speech will likely improve  
324 the potential for decoding speech directly from the motor cortex. A speech BMI that could directly  
325 decode attempted speech would be more efficient than, and could dramatically increase the  
326 communication rate over the current slow and often tedious methods for this patient population (e.g.,  
327 eye trackers and eye gaze communication boards, and even the most recent spelling-based BMIs

328 (Brumberg et al., 2010; Chen et al., 2015; Pandarinath et al., 2017)). While we can use ECoG to identify  
329 words via phonemes (Mugler et al., 2014b), our results here suggest that gestural decoding would  
330 outperform phoneme decoding in BMIs using signals from M1v and PMv. The decoding techniques  
331 used here would require modification for practical “closed-loop” implementation, though simple  
332 repeatable signatures related to phoneme production have already been shown to be useful for real-  
333 time control of simple speech sound-based BMIs (Brumberg et al., 2013; Leuthardt et al., 2011).  
334 Improving our understanding of the cortical control of articulatory movements moves us closer to a  
335 viable cortical speech interface that can decode intended speech movements in real-time.

336 A more accurate understanding of the cortical encoding of sublexical speech production could also  
337 improve identification of functional speech motor areas. More rapid and/or accurate identification of  
338 these areas using ECoG could help to make surgeries for epilepsy or brain tumors more efficient, and  
339 possibly safer, by reducing operative time and number of stimuli and better defining areas to avoid  
340 resecting (Korostenskaja et al., 2013; Roland et al., 2010; Schalk et al., 2008). These results therefore  
341 guide future investigations into development of neurotechnology for speech communication and  
342 functional mapping.

343

## 344 **METHODS**

### 345 **Subject Pool**

346 Nine subjects (mean age 42, 5 female) who required intraoperative ECoG monitoring during  
347 awake craniotomies for glioma removal volunteered to participate in a research protocol during  
348 surgery. We excluded subjects with tumor-related symptoms affecting speech production, and non-  
349 native English speakers, from the study. All tumors were located at least two gyri (~2-3 cm) away  
350 from the recording electrodes. Subjects provided informed consent for research, and the  
351 Institutional Review Board at Northwestern University approved the experimental protocols.

352 Electrode grid placement was determined using both anatomical landmarks and functional  
353 responses to direct cortical stimulation. Electrocortical stimulation of eloquent cortex provided *a*  
354 *priori* knowledge of cortex functionality and served as a “gold standard” for analysis. Areas that,  
355 when stimulated, produced reading arrest were designated as being associated with language, and  
356 areas that produced movements of the tongue and articulators were designated as functional speech  
357 motor areas. ECoG grid placement varied but consistently covered targeted areas of ventral motor  
358 cortex (M1v), premotor cortex (PMv), and inferior frontal gyrus pars opercularis (IFG). We  
359 confirmed grid location with stereotactic procedure planning, anatomical mapping software  
360 (Brainlab), and intraoperative photography (Hermes et al., 2010).

361

### 362 **Data Acquisition**

363 A 64-channel, 8x8 ECoG grid (Integra, 4 mm spacing) was placed over speech motor cortex  
364 connected to a Neuroport data acquisition system (Blackrock Microsystems, Inc.). Both stimulus  
365 presentation and data acquisition were facilitated through a quad-core computer running a  
366 customized version of BCI2000 software (Schalk et al., 2004). Acoustic energy from speech was  
367 measured with a unidirectional lapel microphone (Sennheiser) placed near the patient’s mouth.  
368 Microphone signal was wirelessly transmitted directly to the recording computer (Califone),  
369 sampled at 48 kHz, and synchronized to the neural signal recording.

370 All ECoG signals were bandpass-filtered from 0.5-300 Hz and sampled at 2 kHz. Differential  
371 cortical recordings compared to a reference ECoG electrode were exported for analysis with an  
372 applied bandpass filter (0.53 - 300 Hz) with 75  $\mu$ V sensitivity.

373

### 374 **Experimental Protocol**

375 We presented words in randomized order on a screen at a rate of 1 every 2 seconds, in blocks  
376 of 4.5 minutes. Subjects were instructed to read each word aloud as soon as it appeared. Subjects  
377 were surveyed regarding accent and language history, and all subjects included here were native  
378 English speakers. All subjects completed at least 2 blocks, and up to 3 blocks.

379 All word sets consisted of simple words and varied depending on subject and anatomical grid  
380 coverage. Stimulus words were chosen for their simplicity, phoneme frequency, and phoneme  
381 variety. Many words in the set were selected from the Modified Rhyme Test, consisting of  
382 monosyllabic words with primarily consonant-vowel-consonant (CVC) structure (House et al.,  
383 1963). The frequency of phonemes within the MRT set roughly approximates the phonemic  
384 frequency in American English (Mines et al., 1978). The Modified Rhyme Test was then  
385 supplemented with additional CVC words to incorporate all General American English phonemes  
386 to the word set with a more uniform phoneme incidence. Consonant cluster allophone words  
387 contained initial stop consonants; each allophone example included a voiced, a voiceless, and a  
388 consonant cluster allophone word (for example, “bat”, “pat”, and “spat”; Buchwald and Miozzo,  
389 2011).

390

## 391 **Signal Processing**

392 To create features in the frequency domain, we isolated power changes in the high gamma band  
393 from the neural signal. ECoG signals were first re-referenced to a common average of all channels  
394 in the time domain. The high gamma band, most commonly used in ECoG research due to its  
395 correlation with ensemble spiking activity (Ray et al., 2008), has definitions that vary widely in  
396 the literature. We used the Hilbert transform to isolate band power in 8 linearly distributed 20-Hz  
397 wide sub-bands within the high gamma band that avoided the 60 Hz noise harmonics and averaged  
398 them to obtain the high gamma power (70-290 Hz). We then normalized and z-scored each  
399 channel's high gamma band power changes to create frequency features for each channel.

400 To create features in the time domain, we segmented z-scored high gamma values for each  
401 channel from 300 ms prior to and 300 ms after onset of each event (phoneme or gesture). This  
402 created discrete, event-based trials that summarized the time-varying neural signal directly  
403 preceding and throughout production of each phoneme or gesture. Time windows for allophone  
404 feature creation were shorter (-300 ms to 100 ms) to further reduce the effect of coarticulation on  
405 the allophone classification results. The time-frequency features were then identified and sorted  
406 according to phoneme or gesture event.

407

## 408 **Event labeling**

409 We used visual and auditory inspection of auditory spectral changes to manually label the onset  
410 of each phoneme in the speech signal (Matlab). To label gesture onset times, acoustic-articulatory  
411 inversion was used on the audio recordings of subjects. This technique maps articulator trajectories  
412 from acoustic data, using a model that accounts for subject- and utterance-specific differences in  
413 production. We used an articulatory inversion model, described in (Wang et al., 2015), based on a  
414 deep neural network trained on data from the University of Wisconsin X-ray Microbeam corpus  
415 (Westbury et al., 1990), with missing articulatory data filled in using the data imputation model of  
416 (Wang et al., 2014). AAI output was smoothed with a Gaussian kernel of 50 ms to reduce effects  
417 of environmental noise. Based on the target phonemes, the Task Dynamic model of inter-  
418 articulator coordination was used to generate expected laryngeal and velar movement onset times  
419 (Saltzman and Munhall, 1989). We used these onset times for each event in the speech signal to  
420 segment ECoG features.

421

## 422 **Event Classification and Analysis**

423 Due to the large number of potential features and relatively low number of trials, we used  
424 classwise principal component analysis (CPCA) to reduce dimensionality of the input space and  
425 hence reduce the risk of overfitting. CPCA performs PCA on each class separately, which enables  
426 dimensionality reduction while preserving class-specific information (Das and Nenadic, 2009; Das  
427 et al., 2009). Linear discriminant analysis (LDA) was then used to determine the feature subspace  
428 with the most information about the classes. The high gamma features were then projected into  
429 this subspace and LDA was used to classify the data (Flint et al., 2012b; Slutzky et al., 2011). We  
430 used one-versus-the rest classification, in which one event class was specified, and events not in  
431 that class were combined into a "rest" group. We reported only the accuracy of classifying a given  
432 class (for example, in /p/ vs. the rest, we reported the accuracy of classifying the /p/ class, but not  
433 the "rest" class), to avoid bias due to the imbalance in "one" and "rest" class sizes. We used 10-  
434 fold cross-validation with randomly-selected test sets to compute classification performance. We  
435 repeated the 10-fold cross-validation 10 times (i.e., re-selected random test sets 10 times), for a

436 total of 100 folds. Chance classification accuracies were determined by randomly shuffling event  
437 labels 200 times and re-classifying. We created an overall performance for each subject as a  
438 weighted average of all the events; the performance of each phoneme or gesture was weighted by  
439 the probability of that phoneme or gesture in the data set.

440 We limited our analysis to consonant phonemes for two reasons. First, the TADA model  
441 assumes that the larynx (or glottis) is open by default (Browman and Goldstein, 1992), which  
442 makes it very difficult if not impossible to assign meaningful onset times to this gesture, which is  
443 present in all vowels. In addition, we wished to avoid influence of coarticulation of neighboring  
444 phonemes. Therefore, we removed vowels and /s/ phonemes, as well as the glottis opening gesture,  
445 from the analysis. To ensure sufficient accuracy of our classification models, we only included  
446 phonemes or gestures with at least 15 instances, resulting in roughly the same number of phoneme  
447 classes as gesture classes (average of 15.2 phonemes and 12 gestures across subjects).

448 The discriminability index  $d'$  between two groups is defined as the difference of their means  
449 divided by their pooled standard deviation. For example,  $d' = \frac{(\mu_g - \mu_p)}{\sqrt{(n_g \sigma_g^2 + n_p \sigma_p^2)/(n_g + n_p)}}$ , where  $\mu_g$

450 is the mean of gestures,  $n_g$  is the number of gesture instances minus one, and  $\sigma_g$  is the standard  
451 deviation of gesture instances, and the same symbols with subscript p stand for phonemes.

452 When classifying intraword position of phonemes and gestures, we examined  $d'$  between  
453 accuracy of phonemic or gestural position and chance accuracy. Mean values of  $d'$  were taken  
454 from electrodes that were related to the corresponding gesture type. This was determined by  
455 classifying among all gestures (except larynx) using the high gamma activity from each individual  
456 electrode, in 25 ms time bins, from 100 ms before to 50 ms after gesture onset. We used LDA  
457 classification (with 10x10 cross-validation repeats), since there were only 6 features for each  
458 classifier. Each electrode was denoted as related to the gesture with the highest accuracy in this  
459 classification (e.g., tongue-tip related).

460

## 461 ACKNOWLEDGMENTS

462 We thank Robert D. Flint, Griffin Milsap, Weiran Wang, our EEG technologists, and our  
463 participants. This work was supported in part by the Doris Duke Charitable Foundation (Clinical  
464 Scientist Development Award, grant #2011039), a Northwestern Memorial Foundation Dixon  
465 Translational Research Award (including partial funding from NIH National Center for Advancing  
466 Translational Sciences, UL1TR000150 and UL1TR001422), NIH grants F32DC015708 and  
467 R01NS094748, and NSF grant #1321015.





469 **Supplementary Figure Legends**

470 **Figure 1- Figure Supplement 1.** Electrode array locations for all 9 subjects. Shaded areas  
471 represent the different cortical areas: IFG (green), PMv (blue), and M1v (purple). Note that  
472 Subject 2 was implanted in the right hemisphere and so anterior-posterior direction is reversed.

473

474 **Figure 3- Figure Supplement 1.** Classification accuracy data for all subjects in Figure 3. A)  
475 Mean $\pm$ SD accuracy for each subject (different symbol for each subject) for M1v and PMv  
476 electrodes combined. Chance classification performance shown as dashed line for each subject.  
477 B) Mean accuracy relative to chance for each subject for M1v and PMv electrodes combined. C  
478 and D, Same plots but using electrodes in each area for classification only.

## REFERENCES

- Ballard, K.J., Granier, J.P., and Robin, D.A. (2000). Understanding the nature of apraxia of speech: Theory, analysis, and treatment. *Aphasiology* *14*, 969-995.
- Blakely, T.M., Miller, K.J., Rao, R.P.N., Holmes, M.D., and Ojemann, J.G. (2008). Localization and classification of phonemes using high spatial resolution electrocorticography (ECoG) grids. *Conf Proc IEEE Eng Med Biol Soc*, 4964-4967.
- Bocquelet, F., Hueber, T., Girin, L., Savariaux, C., and Yvert, B. (2016). Real-time control of an articulatory-based speech synthesizer for brain computer interfaces. *PLoS Computational Biology*, *12*, e1005119.
- Bouchard, K.E., and Chang, E.F. (2014). Control of spoken vowel acoustics and the influence of phonetic context in human speech sensorimotor cortex. *Journal of Neuroscience* *34*, 12662-12677.
- Bouchard, K.E., Conant, D.F., Anumanchipalli, G.K., Dichter, B., Chaisanguanthum, K.S., Johnson, K., and Chang, E.F. (2016). High-Resolution, Non-Invasive Imaging of Upper Vocal Tract Articulators Compatible with Human Brain Recordings. *Plos One* *11*, e0151327.
- Bouchard, K.E., Mesgarani, N., Johnson, K., and Chang, E.F. (2013). Functional organization of human sensorimotor cortex for speech articulation. *Nature*.
- Broca, P. (1861). Remarques sur le siège de la faculté du langage articulé suivies d'une observation d'aphémie. *Bull Soc Anat Paris* *6*, 330-357.
- Browman, C.P., and Goldstein, L. (1992). Articulatory phonology: an overview. *Phonetica* *49*, 155-180.
- Brumberg, J.S., Guenther, F.H., and Kennedy, P.R. (2013). An auditory output Brain-Computer interface for speech communication. In *Brain-Computer Interface Research* (Springer), pp. 7-14.
- Brumberg, J.S., Nieto-Castanon, A., Kennedy, P.R., and Guenther, F.H. (2010). Brain-Computer Interfaces for Speech Communication. *Speech communication* *52*, 367-379.
- Buchwald, A. (2014). *Phonetic processing* (New York, NY: Oxford University Press).
- Buchwald, A., and Miozzo, M. (2011). Finding levels of abstraction in speech production: evidence from sound-production impairment. *Psychological science* *22*, 1113-1119.
- Carey, D., and McGettigan, C. (2016). Magnetic resonance imaging of the brain and vocal tract: applications to the study of speech production and language learning. *Neuropsychologia*, 1-11.
- Chao, Z.C., Nagasaka, Y., Fujii, N., Chao, Z.C., Nagasaka, Y., and Fujii, N. (2010). Long-term asynchronous decoding of arm motion using electrocorticographic signals in monkeys. *Frontiers in neuroengineering* *3*, 3.
- Chen, X., Wang, Y., Nakanishi, M., Gao, X., Jung, T.-P., and Gao, S. (2015). High-speed spelling with a noninvasive brain-computer interface. *Proceedings of the National Academy of Sciences*, 201508080.
- Cherian, A., Fernandes, H.L., and Miller, L.E. (2013). Primary motor cortical discharge during force field adaptation reflects muscle-like dynamics. *Journal of neurophysiology* *110*, 768-783.
- Cogan, G.B., Thesen, T., Carlson, C., Doyle, W., Devinsky, O., and Pesaran, B. (2014). Sensory-motor transformations for speech occur bilaterally. *Nature* *507*, 94-98.
- Crone, N.E., Hao, L., Hart, J., Boatman, D., Lesser, R.P., Irizarry, R., and Gordon, B. (2001). Electrocorticographic gamma activity during word production in spoken and sign language. *Neurology* *57*, 2045-2053.
- Das, K., and Nenadic, Z. (2009). An efficient discriminant-based solution for small sample size problem. *Pattern Recognition* *42*, 857-866.

- Das, K., Rizzuto, D.S., and Nenadic, Z. (2009). Mental State Estimation for Brain--Computer Interfaces. *IEEE Transactions on Biomedical Engineering* 56, 2114-2122.
- Denby, B., Schultz, T., Honda, K., Hueber, T., Gilbert, J.M., and Brumberg, J.S. (2010). Silent speech interfaces. *Speech Communication* 52, 270-287.
- Edwards, E., Nagarajan, S.S., Dalal, S.S., Canolty, R.T., Kirsch, H.E., Barbaro, N.M., and Knight, R.T. (2010). Spatiotemporal imaging of cortical activation during verb generation and picture naming. *Neuroimage* 50, 291-301.
- Evarts, E.V. (1968). Relation of pyramidal tract activity to force exerted during voluntary movement. *Journal of Neurophysiology* 31, 14-27.
- Fabre, D., Hueber, T., Bocquelet, F., and Badin, P. (2015). Tongue Tracking in Ultrasound Images using EigenTongue Decomposition and Artificial Neural Networks. *Proceedings of the Interspeech Conference*, 2410-2414.
- Fesl, G., Moriggl, B., Schmid, U.D., Naidich, T.P., Herholz, K., and Yousry, T.A. (2003). Inferior central sulcus: Variations of anatomy and function on the example of the motor tongue area. *NeuroImage* 20, 601-610.
- Flinker, A., Korzeniewska, A., Shestyuk, A.Y., Franaszczuk, P.J., Dronkers, N.F., Knight, R.T., and Crone, N.E. (2015). Redefining the role of Broca's area in speech. *Proceedings of the National Academy of Sciences*, 201414491.
- Flint, R.D., Ethier, C., Oby, E.R., Miller, L.E., and Slutzky, M.W. (2012a). Local field potentials allow accurate decoding of muscle activity. *Journal of Neurophysiology* 108, 18-24.
- Flint, R.D., Lindberg, E.W., Jordan, L.R., Miller, L.E., and Slutzky, M.W. (2012b). Accurate decoding of reaching movements from field potentials in the absence of spikes. *Journal of neural engineering* 9, 046006.
- Flint, R.D., Wang, P.T., Wright, Z.A., King, C.E., Krucoff, M.O., Schuele, S.U., Rosenow, J.M., Hsu, F.P., Liu, C.Y., Lin, J.J., *et al.* (2014). Extracting kinetic information from human motor cortical signals. *Neuroimage* 101, 695-703.
- Gelfand, J.R., and Bookheimer, S.Y. (2003). Dissociating neural mechanisms of temporal sequencing and processing phonemes. *Neuron* 38, 831-842.
- Georgopoulos, A., Schwartz, A., and Kettner, R. (1986). Neuronal population coding of movement direction. *Science* 233, 1416-1419.
- Ghosh, S.S., Tourville, J.A., and Guenther, F.H. (2008). A neuroimaging study of premotor lateralization and cerebellar involvement in the production of phonemes and syllables. *Journal of Speech, Language, and Hearing Research* 51, 1183-1202.
- Guenther, F.H., Ghosh, S.S., and Tourville, J.a. (2006). Neural modeling and imaging of the cortical interactions underlying syllable production. *Brain and language* 96, 280-301.
- Hatsopoulos, N., Joshi, J., and O'Leary, J.G. (2004). Decoding continuous and discrete motor behaviors using motor and premotor cortical ensembles. *Journal of neurophysiology* 92, 1165-1174.
- Herff, C., Heger, D., de Pesters, A., Telaar, D., Brunner, P., Schalk, G., and Schultz, T. (2015). Brain-to-text: decoding spoken phrases from phone representations in the brain. *Frontiers in Neuroscience* 9, 1-11.
- Hermes, D., Miller, K.J., Noordmans, H.J., Vansteensel, M.J., and Ramsey, N.F. (2010). Automated electrocorticographic electrode localization on individually rendered brain surfaces. *Journal of Neuroscience Methods* 185, 293-298.

- Hermes, D., Miller, K.J., Vansteensel, M.J., Aarnoutse, E.J., Leijten, F.S.S., and Ramsey, N.F. (2012). Neurophysiologic correlates of fMRI in human motor cortex. *Human brain mapping* 33, 1689-1699.
- Hickok, G. (2012). Computational neuroanatomy of speech production. *Nature Reviews Neuroscience* 13, 135-145.
- Hickok, G., Houde, J., and Rong, F. (2011). Sensorimotor integration in speech processing: computational basis and neural organization. *Neuron* 69, 407-422.
- Hocherman, S., and Wise, S.P. (1991). Effects of hand movement path on motor cortical activity in awake, behaving rhesus monkeys. *Experimental Brain Research* 83, 285-302.
- House, A.S., Williams, C., Hecker, M.H.L., and Kryter, K.D. (1963). Psychoacoustic speech tests: A modified rhyme test. *The Journal of the Acoustical Society of America* 35, 1899.
- Indefrey, P., and Levelt, W.J. (2004). The spatial and temporal signatures of word production components. *Cognition* 92, 101-144.
- Takei, S., Hoffman, D.S., and Strick, P.L. (1999). Muscle and movement representations in the primary motor cortex. *Science* 285, 2136-2139.
- Kellis, S., Miller, K., Thomson, K., Brown, R., House, P., and Greger, B. (2010). Decoding spoken words using local field potentials recorded from the cortical surface. *Journal of Neural Engineering* 7, 056007.
- Kent, R. (1977). Coarticulation in recent speech production. *Journal of Phonetics* 5, 15-133.
- Korostenskaja, M., Wilson, A.J., Rose, D.F., Brunner, P., Schalk, G., Leach, J., Mangano, F.T., Fujiwara, H., Rozhkov, L., Harris, E., *et al.* (2013). Real-Time Functional Mapping with Electro-corticography in Pediatric Epilepsy: Comparison with fMRI and ESM Findings. *Clinical EEG and neuroscience : official journal of the EEG and Clinical Neuroscience Society (ENCS)*.
- Leuthardt, E.C., Gaona, C., Sharma, M., Szrama, N., Roland, J., Freudenberg, Z., Solis, J., Breshears, J., and Schalk, G. (2011). Using the electrocorticographic speech network to control a brain-computer interface in humans. *Journal of Neural Engineering* 8, 036004.
- Levelt, W.J.M. (1999). Models of word production. *Trends in Cognitive Sciences* 3, 223-232.
- Levelt, W.J.M., Roelofs, A., and Meyer, A.S. (1999). A theory of lexical access in speech production. *Behavioral and Brain Sciences* 22, 1-75.
- Logothetis, N.K., Pauls, J., Augath, M., Trinath, T., and Oeltermann, A. (2001). Neurophysiological investigation of the basis of the fMRI signal. *Nature* 412, 150-157.
- Long, M.A., Katlowitz, K.A., Svirsky, M.A., Clary, R.C., Byun, T.M.A., Majaj, N., Oya, H., Howard, M.A., and Greenlee, J.D.W. (2016). Functional Segregation of Cortical Regions Underlying Speech Timing and Articulation. *Neuron* 89, 1187-1193.
- Lotte, F., Brumberg, J.S., Brunner, P., Gunduz, A., Ritaccio, A.L., Guan, C., and Schalk, G. (2015). Electro-corticographic representations of segmental features in continuous speech. *Frontiers in Human Neuroscience* 09.
- Magen, H.S. (1997). The extent of vowel-to-vowel coarticulation in English. *Journal of Phonetics* 25, 187-205.
- Mehring, C., Nawrot, M.P., de Oliveira, S.C., Vaadia, E., Schulze-Bonhage, A., Aertsen, A., and Ball, T. (2004). Comparing information about arm movement direction in single channels of local and epicortical field potentials from monkey and human motor cortex. *J Physiol Paris* 98, 498-506.
- Mines, M.A., Hanson, B.F., and Shoup, J.E. (1978). Frequency of occurrence of phonemes in conversational English. *Language and speech* 21, 221-241.

- Moran, D.W., and Schwartz, A.B. (1999). Motor cortical representation of speed and direction during reaching. *Journal of Neurophysiology* 82, 2676-2692.
- Morrow, M.M., and Miller, L.E. (2003). Prediction of muscle activity by populations of sequentially recorded primary motor cortex neurons. *Journal of Neurophysiology* 89, 2279-2288.
- Mugler, E.M., Goldrick, M., and Slutzky, M.W. (2014a). Cortical encoding of phonemic context during word production. *Conf Proc IEEE Eng Med Biol Soc* 6790-6793.
- Mugler, E.M., Patton, J.L., Flint, R.D., Wright, Z.A., Schuele, S.U., Rosenow, J., Shih, J.J., Krusienski, D.J., and Slutzky, M.W. (2014b). Direct classification of all American English phonemes using signals from functional speech motor cortex. *Journal of Neural Engineering* 11, 035015.
- Nam, H., Mitra, V., Tiede, M., Hasegawa-Johnson, M., Espy-Wilson, C., Saltzman, E., and Goldstein, L. (2012). A procedure for estimating gestural scores from speech acoustics. *The Journal of the Acoustical Society of America* 132, 3980-3989.
- Nam, H., Mitra, V., Tiede, M.K., Saltzman, E., Goldstein, L., Espy-Wilson, C., and Hasegawa-Johnson, M. (2010). A procedure for estimating gestural scores from articulatory data. *The Journal of the Acoustical Society of America* 127, 1851.
- Oby, E.R., Ethier, C., and Miller, L.E. (2013). Movement representation in the primary motor cortex and its contribution to generalizable EMG predictions. *Journal of Neurophysiology* 109, 666-678.
- Öhman, S.E. (1966). Coarticulation in VCV utterances: Spectrographic measurements. *The Journal of the Acoustical Society of America* 39, 151-168.
- Pandarínath, C., Nuyujukian, P., Blabe, C.H., Sorice, B.L., Saab, J., Willett, F.R., Hochberg, L.R., Shenoy, K.V., and Henderson, J.M. (2017). High performance communication by people with paralysis using an intracortical brain-computer interface. *eLife* 6, e18554.
- Papoutsis, M., de Zwart, J.A., Jansma, J.M., Pickering, M.J., Bednar, J.A., and Horwitz, B. (2009). From phonemes to articulatory codes: An fMRI study of the role of Broca's area in speech production. *Cerebral Cortex* 19, 2156-2165.
- Paz, R., Boraud, T., Natan, C., Bergman, H., and Vaadia, E. (2003). Preparatory activity in motor cortex reflects learning of local visuomotor skills. *Nature Neuroscience* 6, 882-890.
- Pei, X., Barbour, D.L., Leuthardt, E.C., and Schalk, G. (2011). Decoding vowels and consonants in spoken and imagined words using electrocorticographic signals in humans. *Journal of Neural Engineering* 8, 046028.
- Penfield, W., and Boldrey, E. (1937). Somatic motor and sensory representation in the cerebral cortex of man as studied by electrical stimulation. *Brain: A Journal of Neurology* 60, 389-443.
- Penfield, W., and Rasmussen, T. (1949). Vocalization and arrest of speech. *Archives of Neurology and Psychiatry*, 61, 21-27.
- Penfield, W., and Roberts, L. (1959). *Speech and brain mechanisms*. Princeton University Press.
- Pesaran, B., Nelson, M.J., and Andersen, R.A. (2006). Dorsal premotor neurons encode the relative position of the hand, eye, and goal during reach planning. *Neuron* 51, 125-134.
- Pesaran, B., Pezaris, J.S., Sahani, M., Mitra, P.P., and Andersen, R.a. (2002). Temporal structure in neuronal activity during working memory in macaque parietal cortex. *Nature neuroscience* 5, 805-811.
- Proctor, M., Bresch, E., Byrd, D., Nayak, K., and Narayanan, S. (2013). Paralinguistic mechanisms of production in human "beatboxing": a real-time Magnetic Resonance Imaging study. *The Journal of the Acoustical Society of America* 133, 1043-1054.

- Ramsey, N., Salari, E., Aarnoutse, E., Vansteensel, M., Bleichner, M., and Freudenburg, Z. (2017). Decoding spoken phonemes from sensorimotor cortex with high-density ECoG grids. *NeuroImage*.
- Ray, S., Crone, N.E., Niebur, E., Franaszczuk, P.J., and Hsiao, S.S. (2008). Neural correlates of high-gamma oscillations (60-200 Hz) in macaque local field potentials and their potential implications in electrocorticography. *Journal of Neuroscience* 28, 11526-11536.
- Ray, S., and Maunsell, J.H.R. (2011). Different origins of gamma rhythm and high-gamma activity in macaque visual cortex. *PLoS Biology* 9.
- Riecker, A., Ackermann, H., Wildgruber, D., Meyer, J., Dogil, G., Haider, H., and Grodd, W. (2000). Articulatory/phonetic sequencing at the level of the anterior perisylvian cortex: a functional magnetic resonance imaging (fMRI) study. *Brain and language* 75, 259-276.
- Roland, J., Brunner, P., Johnston, J., Schalk, G., and Leuthardt, E.C. (2010). Passive real-time identification of speech and motor cortex during an awake craniotomy. *Epilepsy & behavior : E&B* 18, 123-128.
- Saltzman, E.L., and Munhall, K.G. (1989). A Dynamical Approach to Gestural Patterning in Speech Production. *Ecological psychology*, 333-382.
- Schalk, G., Leuthardt, E.C., Brunner, P., Ojemann, J.G., Gerhardt, L.a., and Wolpaw, J.R. (2008). Real-time detection of event-related brain activity. *NeuroImage* 43, 245-249.
- Schalk, G., McFarland, D.J., Hinterberger, T., Birbaumer, N., and Wolpaw, J.R. (2004). BCI2000: a general-purpose brain-computer interface (BCI) system. *IEEE transactions on bio-medical engineering* 51, 1034-1043.
- Schultz, T., and Wand, M. (2010). Modeling coarticulation in EMG-based continuous speech recognition. *Speech Communication* 52, 341-353.
- Scott, S., and Kalaska, J. (1997). Reaching movements with similar hand paths but different arm orientations. I. Activity of individual cells in motor cortex. *Journal of Neurophysiology*.
- Shen, L., and Alexander, G.E. (1997). Preferential representation of instructed target location versus limb trajectory in dorsal premotor area. *Journal of neurophysiology* 77, 1195-1212.
- Slutzky, M.W., Jordan, L.R., Lindberg, E.W., Lindsay, K.E., and Miller, L.E. (2011). Decoding the rat forelimb movement direction from epidural and intracortical field potentials. *Journal of Neural Engineering* 8, 036013.
- Tate, M.C., Herbet, G., Moritz-Gasser, S., Tate, J.E., and Duffau, H. (2014). Probabilistic map of critical functional regions of the human cerebral cortex: Broca's area revisited. *Brain* 137, 2773-2782.
- Tourville, J.A., Reilly, K.J., and Guenther, F.H. (2008). Neural mechanisms underlying auditory feedback control of speech. *NeuroImage* 39, 1429-1443.
- Wang, W., Arora, R., and Livescu, K. (2014). Reconstruction of articulatory measurements with smoothed low-rank matrix completion. *Spoken Language Technology*.
- Wang, W., Arora, R., Livescu, K., and Bilmes, J.A. (2015). Unsupervised learning of acoustic features via deep canonical correlation analysis. Paper presented at: Proceedings of ICASSP.
- Westbury, J. (1990). X-ray microbeam speech production database. *The Journal of the Acoustical Society of America* 88, S56.
- Westbury, J., Milenkovic, P., Weismer, G., and Kent, R. (1990). X-ray microbeam speech production database. *The Journal of the Acoustical Society of America* 88, S56-S56.
- Whalen, D.H. (1990). Coarticulation is largely planned. *Haskins Laboratories Status Report on Speech Research SR-101/102*, 149-176.

Wise, R.J., Greene, J., Buchel, C., and Scott, S.K. (1999). Brain regions involved in articulation. *Lancet* 353, 1057-1061.

Wise, S., Moody, S., Blomstrom, K., and Mitz, A. (1998). Changes in motor cortical activity during visuomotor adaptation. *Experimental Brain Research* 121, 285-299.
